# Supplementary material for: Biotic response of plankton communities to Middle to Late Miocene monsoon wind and nutrient flux changes in the Oman margin upwelling zone
Source: Copernicus journal article supplement (doi:10.5194/cp-19-2313-2023), 2023-11-13
Supplement: Supplementary file 1 [file cp-19-2313-2023-supplement.zip]

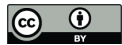

## *Supplement of*

# **Biotic response of plankton communities to Middle to Late Miocene monsoon wind and nutrient flux changes in the Oman margin upwelling zone**

**Gerald Auer et al.**

*Correspondence to:* Gerald Auer ([gerald.auer@uni-graz.at](mailto:gerald.auer@uni-graz.at)) and Or M. Bialik ([obialik@uni-muenster.de](mailto:obialik@uni-muenster.de))

- [cp-19-2313-2023-supplement-title-page.pdf](#)
- [S1.SupplementaryCode\\_IO-eutrophy.py](#)
- [S2.nannofossils.xlsx](#)
- [S3.foraminifera.xlsx](#)
- [S4.Nannofossilenvironmentalparameters.xlsx](#)
- [S5.NannofossilTaphogroupTaxonContribution.xlsx](#)

The copyright of individual parts of the supplement might differ from the article licence.
